# Supplementary material for: Botulinum neurotoxin accurately separates tonic vs. phasic transmission and reveals heterosynaptic plasticity rules in Drosophila
Source: eLife journal article supplement (doi:10.7554/elife.77924), 2022-08-22
Supplement: supp [file elife-77924-supp-v1.zip]

Archive with 11 entries (11 files):
- elife_poa_e77924_Figure_1_figure_supplement_1.pdf
- elife_poa_e77924_Figure_1_figure_supplement_2.pdf
- elife_poa_e77924_Figure_1_figure_supplement_3.pdf
- elife_poa_e77924_Figure_1_figure_supplement_4.pdf
- elife_poa_e77924_Figure_1_figure_supplement_5.pdf
- elife_poa_e77924_Figure_4_figure_supplement_1.pdf
- elife_poa_e77924_Figure_7_figure_supplement_1.pdf
- elife_poa_e77924_Supplementary_file_1.docx
- elife_poa_e77924_Supplementary_file_2.docx
- elife_poa_e77924_Transparent_Reporting_File.pdf
- elife_poa_e77924_Source_code_1.unk
