# Supplementary material for: Botulinum neurotoxin accurately separates tonic vs. phasic transmission and reveals heterosynaptic plasticity rules in Drosophila
Source: eLife journal article supplement (doi:10.7554/elife.77924), 2022-08-22
Supplement: supp [file elife-77924-supp-v1.zip › elife_poa_e77924_Source_code_1.unk]

{
 "cells": [
  {
   "cell_type": "markdown",
   "metadata": {},
   "source": [
    "# 1st cell to load all the packages needed."
   ]
  },
  {
   "cell_type": "code",
   "execution_count": 23,
   "metadata": {
    "jupyter": {
     "source_hidden": true
    },
    "tags": []
   },
   "outputs": [],
   "source": [
    "# first cell to load all the packages needed.\n",
    "from PIL import Image, ImageDraw, ImageSequence # loading images\n",
    "# https://pillow.readthedocs.io/en/stable/reference/index.html\n",
    "import matplotlib.pyplot as plt # plotting\n",
    "import numpy as np # process data array\n",
    "from scipy.signal import butter, lfilter, freqz, find_peaks, filtfilt # peak detection and data filtering\n",
    "# https://docs.scipy.org/doc/scipy/reference/generated/scipy.signal.find_peaks.html#scipy.signal.find_peaks\n",
    "import os # system, load data path\n",
    "from read_roi import read_roi_zip # load ROI file\n",
    "import re # define specifc characters in file names. \n",
    "import pandas as pd # a data structure useful for data output. For example, to clipboard or save to excel"
   ]
  },
  {
   "cell_type": "markdown",
   "metadata": {},
   "source": [
    "# 2nd cell to store all the function used"
   ]
  },
  {
   "cell_type": "code",
   "execution_count": 24,
   "metadata": {
    "jupyter": {
     "source_hidden": true
    },
    "tags": []
   },
   "outputs": [],
   "source": [
    "# second cell to store all the function used\n",
    "def get_file():\n",
    "    data_file_list = []\n",
    "    ROI_file_list = []\n",
    "    data_path = os.getcwd()+'\\data' # get current folderpath\n",
    "    for file in os.listdir(data_path): # get a list of all files in current folder\n",
    "        if file.endswith('.tif'): # find files string ending with \".tif\"\n",
    "            data_file_list.append(data_path+'\\\\'+file)\n",
    "            ROI_file_list.append(data_path+'\\\\'+file.replace('.tif', '.zip'))\n",
    "            # put data files and ROI files in lists\n",
    "    return data_file_list, ROI_file_list # return data in lists and ROI in lists\n",
    "    \n",
    "def get_ROI_stats(data_file, ROI_file, plot_dict): # input data path, ROI path and start/end time and framerate\n",
    "                                                   # return a dic, the key is each ROI, the value is a list containing mean of ROI through time\n",
    "    start_frame = round(plot_dict['plot_start']*plot_dict['frame_rate'])\n",
    "    end_frame = round(plot_dict['plot_end']*plot_dict['frame_rate'])\n",
    "    rois = read_roi_zip(ROI_file) # ROI information in a dic, key is ROI name, value is the information in dic\n",
    "                                # in the information dic, key 'x' and 'y' contain the xy coordinates\n",
    "                                #of the ROI circle in lists\n",
    "    im = Image.open(data_file) # load data file\n",
    "    width_im, lenth_im = im.size # get the x and y pixel number of the data\n",
    "    all_ROI_mean_dict = {}\n",
    "    for key,value in rois.items(): # iterate each ROI\n",
    "        ROI_xy = sum(zip(rois[key]['x'],rois[key]['y']),()) # switch [x,x,x...] and [y,y,y...] into (x,y,x,y,x,y...)\n",
    "        mask_im = Image.new('L',[width_im,lenth_im],1)\n",
    "        # generate a new image in pillw with the size of the data\n",
    "        # L means 8 bit image, here 1 is the fillin value, meaning invalid in numpy mask\n",
    "        ImageDraw.Draw(mask_im).polygon(ROI_xy,outline=0,fill=0) # draw a ROI in the new image, fill in 0\n",
    "        mask_array = np.array(mask_im) # generate a numpy array based on the image values, 0 in ROI and 1 in the rest\n",
    "        single_ROI_mean_list = [] # generate a list to store the ROI mean through frames\n",
    "        for i in np.arange(start_frame, end_frame, 1): # iteration from start frame to end frame\n",
    "            frame = ImageSequence.Iterator(im)[i]\n",
    "            # ImageSequence.Iterator(im) will generate an iterator of the loaded image\n",
    "            # here get each frame being iterated\n",
    "            frame_array = np.asarray(frame) # switch the frame into np array\n",
    "\n",
    "            single_ROI_mean_list.append(round(np.ma.masked_array(frame_array, mask = mask_array).mean(), 2))\n",
    "            # store ROI mean of single frame into the list\n",
    "            # np.ma.masked_array() acquire a mask in the numpy array\n",
    "            # in the mask array, ROI is filled with 0 and the rest is 1, 1 mean invalid\n",
    "        all_ROI_mean_dict[key] = single_ROI_mean_list\n",
    "        # generate a dic, the key is ROI name, the value is the list containing ROI mean value\n",
    "    return all_ROI_mean_dict\n",
    "\n",
    "def butter_lowpass(cutoff, frame_rate, order):\n",
    "    nyq = 0.5 * frame_rate\n",
    "    normal_cutoff = cutoff / nyq\n",
    "    b, a= butter(order, normal_cutoff, btype='low', output = 'ba', analog=False)\n",
    "    return b, a\n",
    "\n",
    "def butter_lowpass_filter(ROI_mean_dict, cutoff, frame_rate, order):\n",
    "    ROI_mean_dict_LF = {}\n",
    "    for key,value in ROI_mean_dict.items():       \n",
    "        b, a= butter_lowpass(cutoff, frame_rate, order=order)\n",
    "        ROI_mean_dict_LF[key] = filtfilt(b, a, value) \n",
    "    return ROI_mean_dict_LF\n",
    "\n",
    "def butter_lowpass_filter_1(data, cutoff, frame_rate, order):      \n",
    "    b, a= butter_lowpass(cutoff, frame_rate, order=order)\n",
    "    data_LF = filtfilt(b, a, data) \n",
    "    return data_LF\n",
    "\n",
    "def norm(ROI_mean_dict_LF, bin_width1, bin_width2): # data normalization. For calculating deltaF/F.\n",
    "    ROI_base_dict = {}\n",
    "    ROI_mean_dict_LF_norm = {}\n",
    "    for key,data in ROI_mean_dict_LF.items():\n",
    "        data_low = []\n",
    "        data_base = []\n",
    "        for i,frame in enumerate(data):\n",
    "            if i < len(data)-bin_width1:\n",
    "                low_value = np.mean(np.sort(data[i:i+bin_width1])[:round(bin_width1*10/100)])\n",
    "            if i >= len(data)-bin_width1:\n",
    "                low_value = np.mean(np.sort(data[i-bin_width1:i])[:round(bin_width1*10/100)])\n",
    "            data_low.append(low_value)\n",
    "        for i,frame in enumerate(data_low):\n",
    "            if i < len(data_low)-bin_width2:\n",
    "                high_value = np.mean(np.sort(data_low[i:i+bin_width2])[round(bin_width1*50/100):])\n",
    "            if i >= len(data_low)-bin_width2:\n",
    "                high_value = np.mean(np.sort(data_low[i-bin_width2:i])[round(bin_width1*50/100):])\n",
    "            data_base.append(high_value)\n",
    "        data_streight = np.subtract(np.array(data[:len(data_base)]), np.array(data_base))\n",
    "        ROI_base_dict[key] = np.array(data_base)\n",
    "        ROI_mean_dict_LF_norm[key] = np.round(np.divide(data_streight, data_base), decimals = 4)\n",
    "    return ROI_mean_dict_LF_norm, ROI_base_dict\n",
    "\n",
    "def norm_1(data, bin_width1, bin_width2): # data normalization. For calculating deltaF/F.\n",
    "    data_low = []\n",
    "    data_base = []\n",
    "    for i,frame in enumerate(data):\n",
    "        if i < len(data)-bin_width1:\n",
    "            low_value = np.mean(np.sort(data[i:i+bin_width1])[:round(bin_width1*10/100)])\n",
    "        if i >= len(data)-bin_width1:\n",
    "            low_value = np.mean(np.sort(data[i-bin_width1:i])[:round(bin_width1*10/100)])\n",
    "        data_low.append(low_value)\n",
    "    for i,frame in enumerate(data_low):\n",
    "        if i < len(data_low)-bin_width2:\n",
    "            high_value = np.mean(np.sort(data_low[i:i+bin_width2])[round(bin_width1*50/100):])\n",
    "        if i >= len(data_low)-bin_width2:\n",
    "            high_value = np.mean(np.sort(data_low[i-bin_width2:i])[round(bin_width1*50/100):])\n",
    "        data_base.append(high_value)\n",
    "    data_streight = np.subtract(np.array(data[:len(data_base)]), np.array(data_base))\n",
    "    data_base = np.array(data_base)\n",
    "    data_norm = np.round(np.divide(data_streight, data_base), decimals = 4)\n",
    "    return data_norm, data_base\n",
    "\n",
    "\n",
    "\n",
    "def smooth(trace): # data smoothing. I didn't use it in this method\n",
    "    trace_smooth = []\n",
    "    for i,frame in enumerate(trace[:-bin_width_smooth]):\n",
    "        frame_ave = np.mean(trace[i:i+bin_width_smooth])\n",
    "        if i >= len(trace)-bin_width_smooth:\n",
    "            frame_ave = np.mean(trace[i-bin_width_smooth:i])\n",
    "        trace_smooth.append(frame_ave)\n",
    "    return trace_smooth\n",
    "\n",
    "def peak_detect(ROI_mean_dict_LF_norm, peak_detect_dict): # detect recurrent event when needed.\n",
    "    ROI_peak_dict = {}\n",
    "    ytop = []\n",
    "    ybottom = []\n",
    "    peak_rise = 50\n",
    "    peak_decay = 50\n",
    "    for key in ROI_mean_dict_LF_norm.keys():\n",
    "        peak_idx, properties = find_peaks(ROI_mean_dict_LF_norm[key],\\\n",
    "                                          height = peak_detect_dict['height'],\\\n",
    "                                          width = peak_detect_dict['width'],\\\n",
    "                                          prominence = peak_detect_dict['prominence'])\n",
    "        ROI_peak_trace = []\n",
    "        for idx in peak_idx:\n",
    "            peak_trace = ROI_mean_dict_LF_norm[key][idx-peak_rise : idx+peak_decay]\n",
    "            if len(peak_trace) == 0:\n",
    "                ROI_peak_trace.append(None)\n",
    "            else:\n",
    "                ROI_peak_trace.append(peak_trace)\n",
    "#             ROI_peak_trace.append(peak_trace)\n",
    "        peak_dict = {'peak_idx' : peak_idx,\\\n",
    "                     'left_base_idx' : properties['left_bases'],\\\n",
    "                     'peak_amp' : properties['peak_heights'],\\\n",
    "                     'peak_frq' : properties['peak_heights'].size/(len(ROI_mean_dict_LF_norm[key])/peak_detect_dict['frame_rate']),\\\n",
    "                     'ROI_peak_trace': ROI_peak_trace}\n",
    "\n",
    "        ytop.append(np.max(ROI_mean_dict_LF_norm[key]))\n",
    "        ybottom.append(np.min(ROI_mean_dict_LF_norm[key]))\n",
    "        ROI_peak_dict[key] = peak_dict\n",
    "    \n",
    "    for key in ROI_peak_dict.keys():\n",
    "        trace = ROI_mean_dict_LF_norm[key]\n",
    "        time = np.arange(0,len(trace)/frame_rate,1/frame_rate)\n",
    "        peak_idx = ROI_peak_dict[key]['peak_idx']\n",
    "        plt.figure(figsize=(20,5))\n",
    "        plt.plot(time, trace, 'c-', linewidth = 2, label='norm data')\n",
    "        plt.plot(time[peak_idx], trace[peak_idx], 'oy')\n",
    "        plt.plot(time[ROI_peak_dict[key]['left_base_idx']], trace[ROI_peak_dict[key]['left_base_idx']], 'or')\n",
    "        plt.vlines(x = time[peak_idx],\\\n",
    "                   ymin = trace[peak_idx] - ROI_peak_dict[key]['peak_amp'],\\\n",
    "                   ymax = trace[peak_idx], color = \"C1\")\n",
    "        plt.xlabel('Time [sec]')\n",
    "        plt.grid( which ='both')\n",
    "        plt.ylim(np.min(ybottom)*2,np.max(ytop)*0.2)\n",
    "        print('hello')\n",
    "        print(np.max(ytop))\n",
    "        print(np.min(ybottom))\n",
    "        print(np.min(ybottom)*0.5,np.max(ytop)*1)\n",
    "        plt.xlim(0,len(trace)/frame_rate)\n",
    "        plt.suptitle(key)\n",
    "        plt.legend()\n",
    "        plt.show()\n",
    "    return ROI_peak_dict\n",
    "\n",
    "def peak_detect_1(data, peak_detect_dict, ROI): # detect recurrent event when needed.\n",
    "#     ROI_peak_dict = {}\n",
    "    ytop = []\n",
    "    ybottom = []\n",
    "    # peak_rise = 50\n",
    "    # peak_decay = 50\n",
    "    peak_rise = peak_detect_dict['peak_rise']\n",
    "    peak_decay = peak_detect_dict['peak_decay']\n",
    "#     for key in ROI_mean_dict_LF_norm.keys():\n",
    "    peak_idx, properties = find_peaks(data,\\\n",
    "                                      height = peak_detect_dict['height'],\\\n",
    "                                      width = peak_detect_dict['width'],\\\n",
    "                                      prominence = peak_detect_dict['prominence'])\n",
    "    peak_trace_list = []\n",
    "    peak_name_list = []\n",
    "    for idx in peak_idx:\n",
    "        peak_trace = data[idx-peak_rise : idx+peak_decay]\n",
    "        if len(peak_trace) == 0:\n",
    "            peak_trace_list.append(None)\n",
    "            peak_name_list.append(None)\n",
    "        else:\n",
    "            peak_trace_list.append(peak_trace)\n",
    "            peak_name_list.append(ROI)\n",
    "    peak_dict = {'peak_idx' : peak_idx,\\\n",
    "                 'left_base_idx' : properties['left_bases'],\\\n",
    "                 'peak_amp' : properties['peak_heights'],\\\n",
    "                 'peak_frq' : properties['peak_heights'].size/(len(data)/peak_detect_dict['frame_rate']),\\\n",
    "                 'ROI_peak_trace': peak_trace_list,\\\n",
    "                 'ROI_peak_name': peak_name_list}\n",
    "\n",
    "    ytop.append(np.max(data))\n",
    "    ybottom.append(np.min(data))\n",
    "#         ROI_peak_dict[key] = peak_dict\n",
    "    \n",
    "#     for key in ROI_peak_dict.keys():\n",
    "    trace = data\n",
    "    time = np.arange(0,len(trace)/frame_rate,1/frame_rate)\n",
    "    peak_idx = peak_dict['peak_idx']\n",
    "    plt.figure(figsize=(20,5))\n",
    "    plt.plot(time, trace, 'c-', linewidth = 2, label='norm data')\n",
    "    plt.plot(time[peak_idx], trace[peak_idx], 'oy')\n",
    "    plt.plot(time[peak_dict['left_base_idx']], trace[peak_dict['left_base_idx']], 'or')\n",
    "    plt.vlines(x = time[peak_idx],\\\n",
    "               ymin = trace[peak_idx] - peak_dict['peak_amp'],\\\n",
    "               ymax = trace[peak_idx], color = \"C1\")\n",
    "    plt.xlabel('Time [sec]')\n",
    "    plt.grid( which ='both')\n",
    "    plt.ylim(np.min(ybottom)*2,np.max(ytop)*1.5)\n",
    "    plt.xlim(0,len(trace)/frame_rate)\n",
    "    plt.suptitle(ROI)\n",
    "    plt.legend()\n",
    "    plt.show()\n",
    "    return peak_dict\n",
    "\n",
    "\n",
    "def stim_detect(ROI_mean_dict_LF_norm, plot_dict, peak_detect_dict):\n",
    "    stim_peak_dict = {}\n",
    "    ytop = []\n",
    "    ybottom = []\n",
    "    for key in ROI_mean_dict_LF_norm.keys():\n",
    "        peak_idx_list = []\n",
    "        peak_amp_list = []\n",
    "        for i in np.arange(peak_detect_dict['stim_number']):\n",
    "            start_idx = (peak_detect_dict['stim_start']-plot_dict['plot_start']+i*peak_detect_dict['stim_interv'])*peak_detect_dict['frame_rate']\n",
    "            end_idx = start_idx + peak_detect_dict['stim_interv']*peak_detect_dict['frame_rate']\n",
    "            if end_idx > len(ROI_mean_dict_LF_norm[key]):\n",
    "                break\n",
    "            single_trace = ROI_mean_dict_LF_norm[key][start_idx:end_idx]\n",
    "            peak_idx = start_idx + np.argmax(single_trace)\n",
    "            peak_amp = np.max(single_trace)\n",
    "            peak_idx_list.append(peak_idx)\n",
    "            peak_amp_list.append(peak_amp)\n",
    "        peak_dict = {'peak_idx': peak_idx_list,\\\n",
    "                     'peak_amp': np.round(peak_amp_list, decimals = 4)}\n",
    "        stim_peak_dict[key] = peak_dict\n",
    "        ytop.append(np.max(ROI_mean_dict_LF_norm[key]))\n",
    "        ybottom.append(np.min(ROI_mean_dict_LF_norm[key]))\n",
    "        \n",
    "    for key in stim_peak_dict.keys():\n",
    "        trace = ROI_mean_dict_LF_norm[key]\n",
    "        time = np.arange(0,len(trace)/frame_rate,1/frame_rate)\n",
    "        peak_idx = stim_peak_dict[key]['peak_idx']\n",
    "        plt.figure(figsize=(20,5))\n",
    "        plt.plot(time, trace, 'c-', linewidth = 2, label='norm data')\n",
    "        plt.plot(time[peak_idx], trace[peak_idx], 'oy')\n",
    "#         plt.plot(time[stim_peak_dict[key]['left_base_idx']], trace[stim_peak_dict[key]['left_base_idx']], 'or')\n",
    "        plt.vlines(x = time[peak_idx],\\\n",
    "                   ymin = trace[peak_idx] - stim_peak_dict[key]['peak_amp'],\\\n",
    "                   ymax = trace[peak_idx], color = \"C1\")\n",
    "        plt.xlabel('Time [sec]')\n",
    "        plt.grid( which ='both')\n",
    "        plt.ylim(np.min(ybottom)*0.5,np.max(ytop)*1.02)\n",
    "        plt.xlim(0,len(trace)/frame_rate)\n",
    "        plt.suptitle(key)\n",
    "        plt.legend()\n",
    "        plt.show()\n",
    "    return stim_peak_dict\n",
    "\n",
    "def copy_result(result_dict):\n",
    "    result_df = pd.DataFrame.from_dict(result_dict)\n",
    "    print(result_df)\n",
    "    result_df.to_clipboard(sep='\\t', index=False)"
   ]
  },
  {
   "cell_type": "markdown",
   "metadata": {
    "tags": []
   },
   "source": [
    "# 3rd cell to specify all the parameters for analysis"
   ]
  },
  {
   "cell_type": "code",
   "execution_count": 51,
   "metadata": {
    "jupyter": {
     "source_hidden": true
    },
    "tags": []
   },
   "outputs": [],
   "source": [
    "bool_mini_or_Evoke = 0 # 0 stands for mini, 1 stands for evoke\n",
    "bool_raw_trace = 0 # 1 mean output raw trace, 0 mean not\n",
    "bool_norm_trace = 0 # 1 means output normalized trace, 0 means not\n",
    "bool_pool_peak = 0 # 1 means output pooled peak amp, 0 means not\n",
    "bool_peak_trace = 0\n",
    "# 1) smooth parameters (in frame)\n",
    "frame_rate = 100 # Hz\n",
    "order = 20 # Order for low pass filter\n",
    "cutoff = 20 # Cut off frequency for low pass filter, in Hz\n",
    "bin_width_smooth = 5 # Window for smoothing, in frame. This was designed to smooth noisy data trace. But if you did smoothing\n",
    "                     # of the imaging data, you shouldn't need it. And we should make sure our imaging was stable and not drifting\n",
    "                     # before we analyze it. So I didn't put the smoothing function in this method.\n",
    "bin_width_norm1 = 200 # Windows legnth for calculating 1th baseline, in frame, bin_width must be longer than a typical peak\n",
    "                      # duration. But shorter than the plotting length.\n",
    "bin_width_norm2 = 200 # Windows legnth for calculating 2nd baseline, in frame\n",
    "\n",
    "\n",
    "# 2) peak detection parameters (after normalization)\n",
    "height = 0.025 # the absolute amplitude threshold. Important parameter for peak detection\n",
    "width = 3 # the minimal frame window to search for a peak. use smaller value to accomodate narrower peak or double peak\n",
    "prominence = 0.02 # the distance between peak to the nearest valley. Important parameter for peak detection.\n",
    "threshold = 0.1 # not very useful\n",
    "peak_rise_time = 0.3 # in s, how long is the rising phase for peak trace\n",
    "peak_decay_time = 0.8 # in s,  how long is the decay phase for peak trace\n",
    "peak_detect_dict = {'height':height,\\\n",
    "                    'width':width,\\\n",
    "                    'prominence':prominence,\\\n",
    "                    'threshold':threshold,\\\n",
    "                    'frame_rate':frame_rate,\\\n",
    "                    'peak_rise': int(peak_rise_time*frame_rate),\\\n",
    "                    'peak_decay': int(peak_decay_time*frame_rate)}\n",
    "\n",
    "# 3) plot parameters (in s)\n",
    "plot_start = 0 # Ploting start time, in s\n",
    "plot_end = 60 # Ploting end time, in s\n",
    "              # if you need to output data traces, you can only acquire 4000 frames at once. So if you need to output longer\n",
    "              # traces, you need to select separately and align them together in excel.\n",
    "# generate a dictionary to store plor parameters\n",
    "plot_dict = {'frame_rate':frame_rate,\\\n",
    "             'plot_start':plot_start,\\\n",
    "             'plot_end':plot_end}\n",
    "\n",
    "# 4) recurrent stim detection (in s)\n",
    "stim_start = 61\n",
    "stim_interv = 5\n",
    "stim_number = 10\n",
    "stim_detect_dict = {'stim_start': stim_start,\\\n",
    "                    'stim_interv': stim_interv,\\\n",
    "                    'stim_number': stim_number,\\\n",
    "                    'frame_rate': frame_rate}"
   ]
  },
  {
   "cell_type": "markdown",
   "metadata": {},
   "source": [
    "# 4th cell to process data and acquire result"
   ]
  },
  {
   "cell_type": "code",
   "execution_count": 52,
   "metadata": {
    "tags": []
   },
   "outputs": [],
   "source": [
    "ROI_mean_dict = get_ROI_stats(get_file()[0][0], get_file()[1][0], plot_dict)\n",
    "# put in data, ROI file and plot parameters, return a dictionary\n",
    "# the keys are ROI names, values are a list containing ROI mean value through time"
   ]
  },
  {
   "cell_type": "code",
   "execution_count": 53,
   "metadata": {
    "tags": []
   },
   "outputs": [],
   "source": [
    "result_dict = {} # an empty dictionary to store result to output \n",
    "file_name_list = [] # an empty list to store all the file names\n",
    "ROI_name_list = [] # an empty list to store all the ROI names\n",
    "peak_amp_list = [] # an empty list to store all the mean amps\n",
    "peak_amp_pool_list = [] # an empty list to store all the pooled amps\n",
    "peak_frq_list = [] # an empty list to store all the peak frequencies\n",
    "stim_amp_list = [] # an empty list to store all the evoke/ recurrent peak mean amps\n",
    "raw_trace_list = []\n",
    "norm_trace_list = []\n",
    "Peak_trace_dict = {}\n",
    "\n",
    "ROI_mean_dict_LF = {}\n",
    "for ROI in ROI_mean_dict.keys():\n",
    "    ROI_mean_dict_LF[ROI] = butter_lowpass_filter_1(ROI_mean_dict[ROI], cutoff, frame_rate, order)    \n",
    "ROI_mean_dict_LF_norm = {}\n",
    "ROI_mean_dict_LF_base = {}\n",
    "for ROI in ROI_mean_dict_LF.keys():    \n",
    "    ROI_mean_dict_LF_norm[ROI], ROI_mean_dict_LF_base[ROI] = norm_1(ROI_mean_dict_LF[ROI],bin_width_norm1,bin_width_norm2)"
   ]
  },
  {
   "cell_type": "code",
   "execution_count": null,
   "metadata": {
    "tags": []
   },
   "outputs": [],
   "source": [
    "if bool_mini_or_Evoke == 0:\n",
    "    ROI_name = []\n",
    "    peak_amp = []\n",
    "    peak_trace = []\n",
    "    for ROI in ROI_mean_dict_LF_norm.keys():\n",
    "        peak_dict = peak_detect_1(ROI_mean_dict_LF_norm[ROI], peak_detect_dict, ROI)\n",
    "        # this is to detect peak events\n",
    "        # put in deltaF/F data dict and parameters, return a dict. The key is the ROI name, the value is another dict\n",
    "        # the value dict has 4 keys: \"index of peaks\" , \"index of baseline\", amp of \"peaks\", \"event frequency\"\n",
    "        # the value are: list, list, list, number\n",
    "        ROI_name = ROI_name + list(peak_dict['ROI_peak_name'])\n",
    "        peak_amp = peak_amp + list(peak_dict['peak_amp'])\n",
    "        peak_trace = peak_trace + list(peak_dict['ROI_peak_trace'])\n",
    "            \n",
    "#         peak_trace_list.append(peak_dict['ROI_peak_trace'])\n",
    "#         print(len(peak_dict['ROI_peak_trace']))\n",
    "\n",
    "        file_name_list.append(get_file()[0][0])\n",
    "        # store file names in a list, \\d\\d\\d\\d\\d\\d means 6 consecutive digits\n",
    "        # find 6 digits from the begining and 2 digit from the end\n",
    "        ROI_name_list.append(ROI)\n",
    "        # store ROI lists in a list for each data\n",
    "        peak_amp_list.append(np.mean(peak_dict['peak_amp']))\n",
    "        # calculate mean mini amp of each ROI and store them in a list for each data\n",
    "        peak_amp_pool_list.append(list(peak_dict['peak_amp']))\n",
    "        peak_frq_list.append(peak_dict['peak_frq'])\n",
    "        # store mini frequency in a list for each data\n",
    "        raw_trace_list.append(ROI_mean_dict[ROI])\n",
    "        norm_trace_list.append(list(ROI_mean_dict_LF_norm[ROI]))\n",
    "    \n",
    "    Peak_trace_dict['ROI_name'] = ROI_name\n",
    "    Peak_trace_dict['peak_amp'] = peak_amp\n",
    "    Peak_trace_dict['peak_trace'] = peak_trace\n"
   ]
  },
  {
   "cell_type": "code",
   "execution_count": 55,
   "metadata": {
    "tags": []
   },
   "outputs": [],
   "source": [
    "if bool_mini_or_Evoke == 0:            \n",
    "    result_dict['file_name'] = file_name_list\n",
    "    result_dict['ROI_name'] = ROI_name_list\n",
    "    result_dict['peak_amp'] = peak_amp_list\n",
    "    result_dict['peak_frq'] = peak_frq_list\n",
    "    if bool_pool_peak == 1:\n",
    "        result_dict['peak_amp_pool'] = peak_amp_pool_list\n",
    "    if bool_raw_trace == 1:\n",
    "        result_dict['raw_trace'] = raw_trace_list\n",
    "    if bool_norm_trace ==1:\n",
    "        result_dict['norm_trace'] = norm_trace_list\n",
    "    # if bool_peak_trace ==1:\n",
    "    #     copy_result(result_dict)\n",
    "    if bool_peak_trace ==1:\n",
    "        copy_result(Peak_trace_dict)\n"
   ]
  },
  {
   "cell_type": "code",
   "execution_count": null,
   "metadata": {},
   "outputs": [],
   "source": [
    "copy_result(result_dict)"
   ]
  },
  {
   "cell_type": "markdown",
   "metadata": {
    "jp-MarkdownHeadingCollapsed": true,
    "tags": []
   },
   "source": [
    "# 5th cell is to output data, here output to clipboard because it's handy"
   ]
  }
 ],
 "metadata": {
  "kernelspec": {
   "display_name": "Python 3 (ipykernel)",
   "language": "python",
   "name": "python3"
  },
  "language_info": {
   "codemirror_mode": {
    "name": "ipython",
    "version": 3
   },
   "file_extension": ".py",
   "mimetype": "text/x-python",
   "name": "python",
   "nbconvert_exporter": "python",
   "pygments_lexer": "ipython3",
   "version": "3.8.12"
  }
 },
 "nbformat": 4,
 "nbformat_minor": 4
}
