# Supplementary figures and images for: Botulinum neurotoxin accurately separates tonic vs. phasic transmission and reveals heterosynaptic plasticity rules in Drosophila
Source: eLife journal article supplement (doi:10.7554/elife.77924), 2022-08-22

# A OK6-GAL4

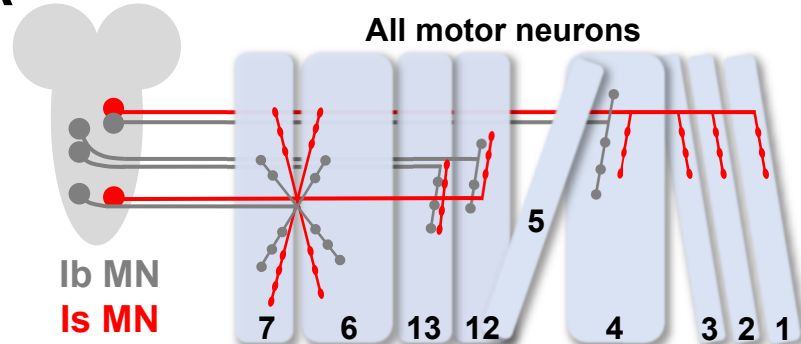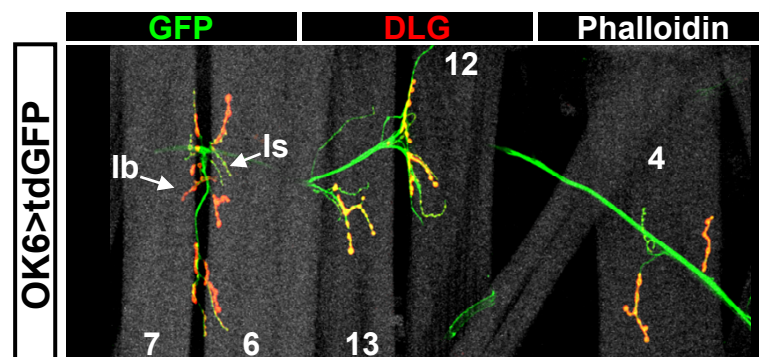

# B OK319-GAL4

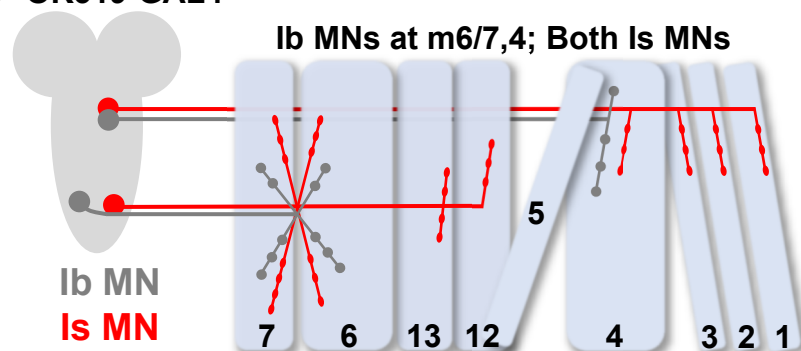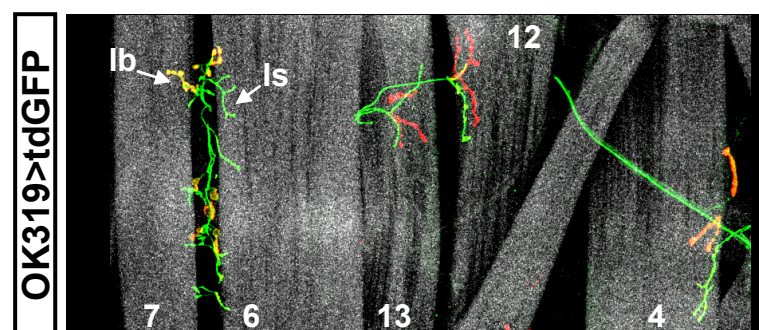

# C dHB9-GAL4 (Ib-GAL4)

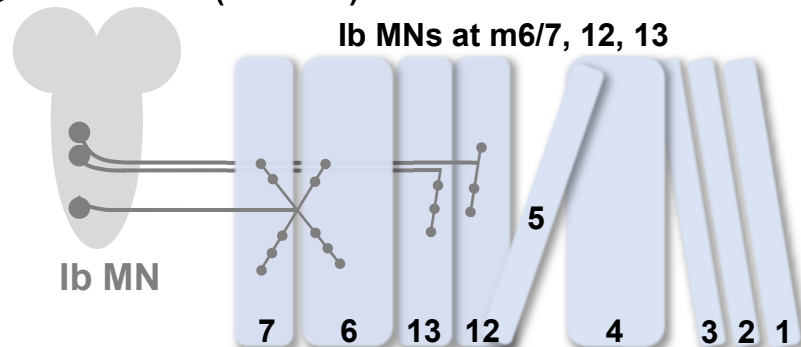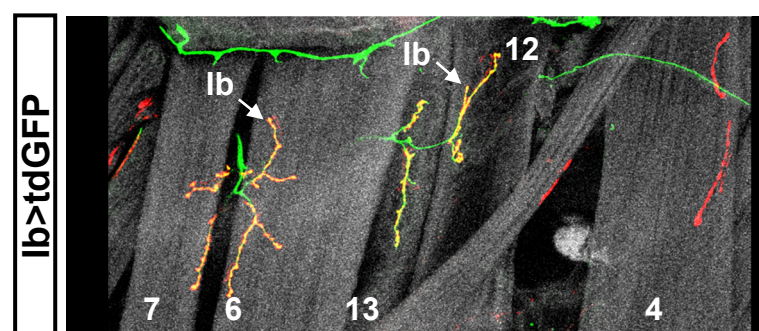

# D R27E09-GAL4 (Is-GAL4)

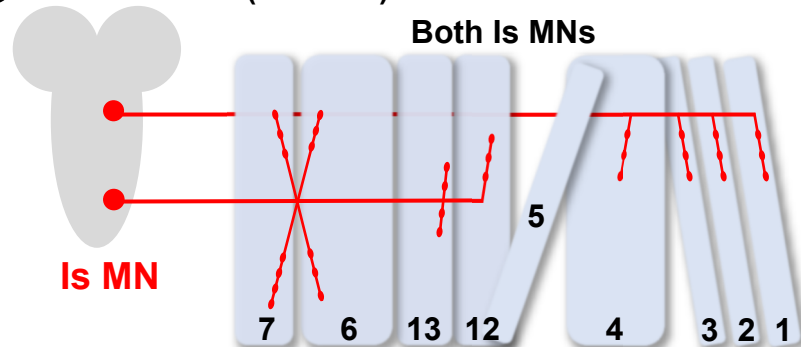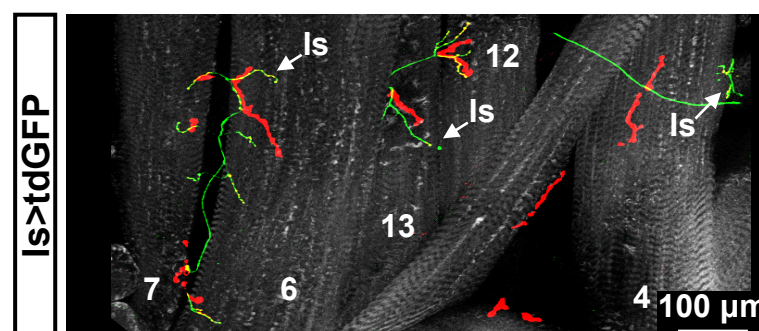

Supplement: supp [file elife-77924-supp-v1.zip › elife_poa_e77924_Figure_1_figure_supplement_1.pdf]

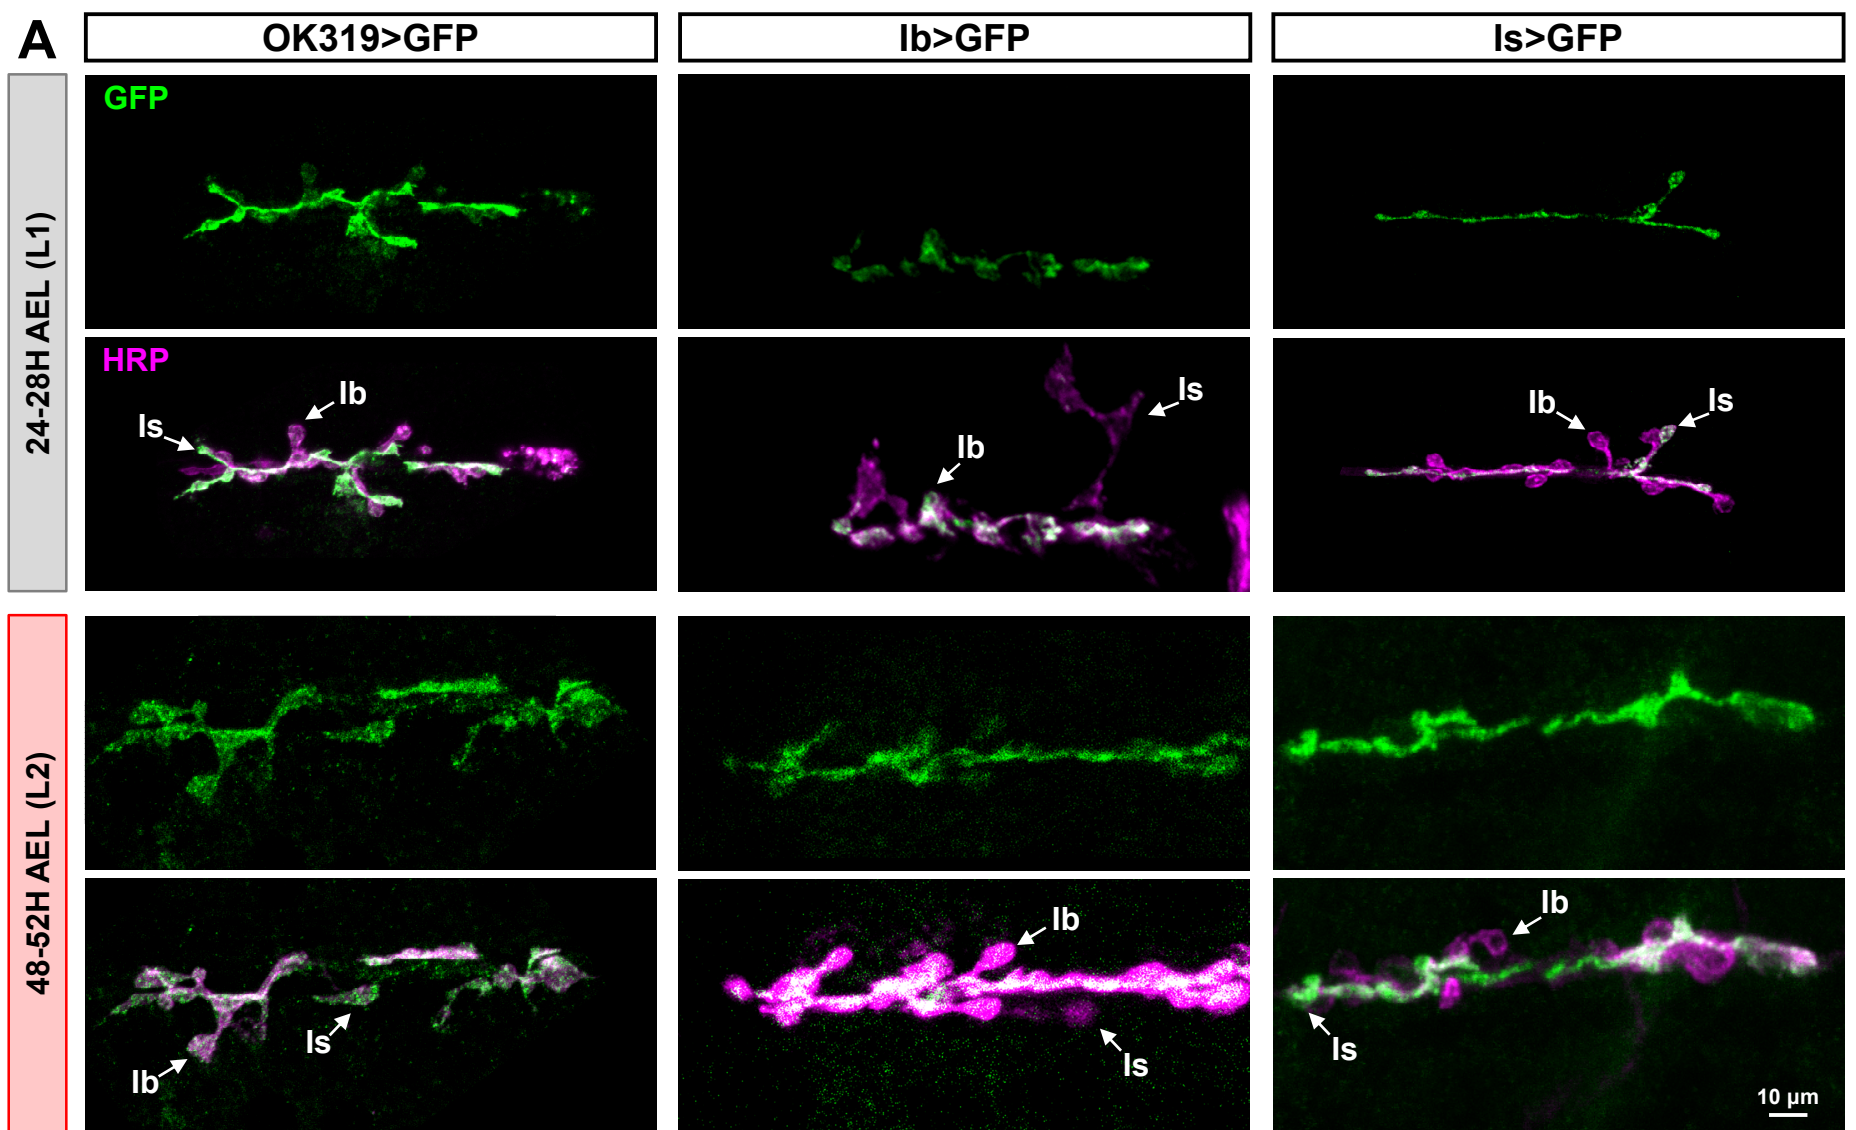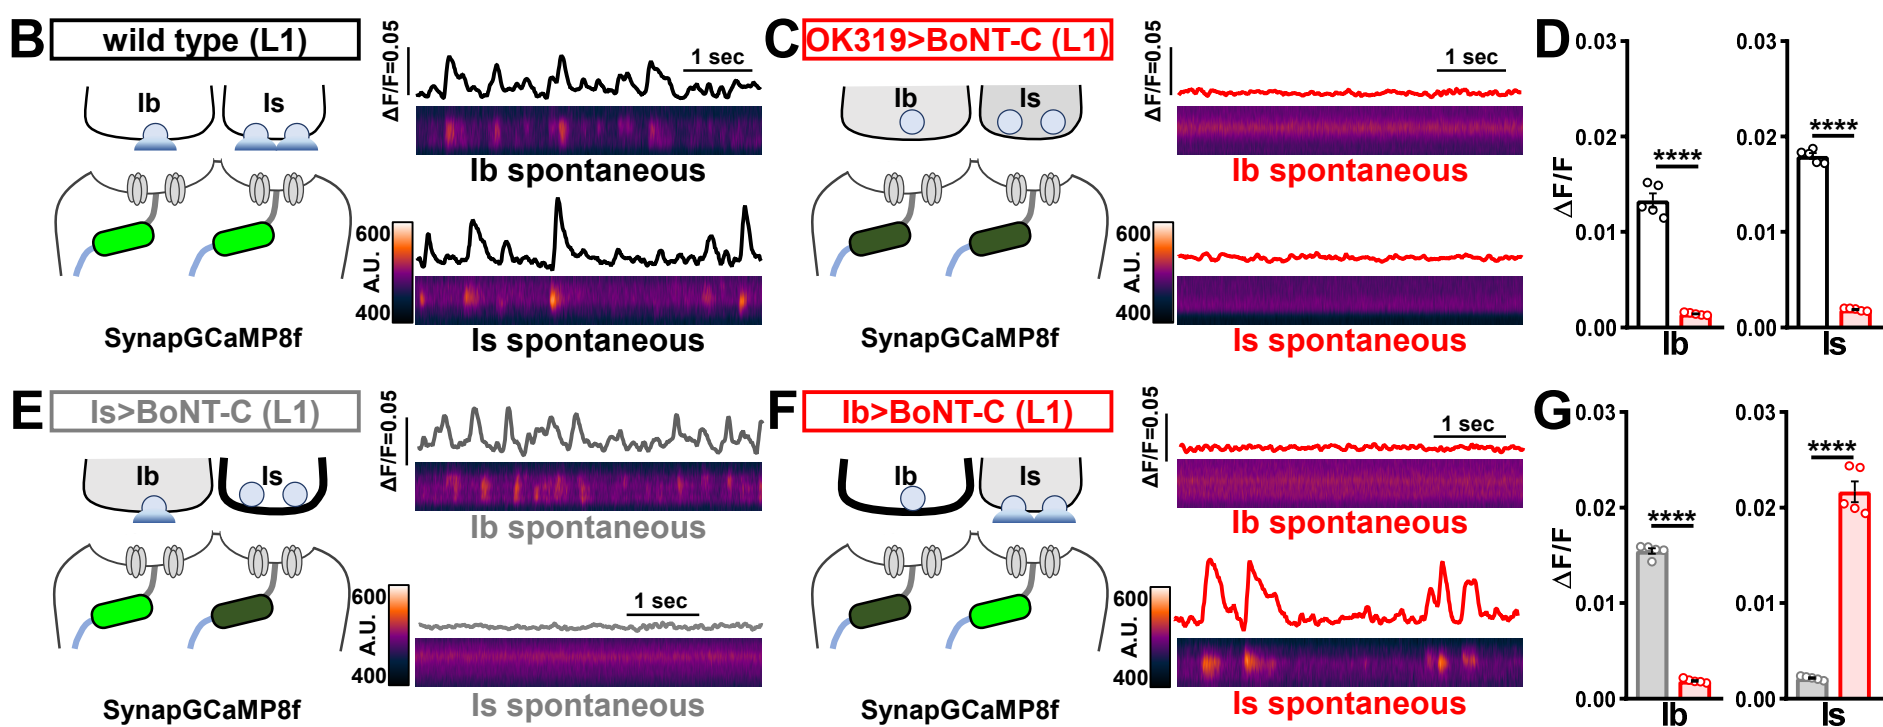

Supplement: supp [file elife-77924-supp-v1.zip › elife_poa_e77924_Figure_1_figure_supplement_2.pdf]

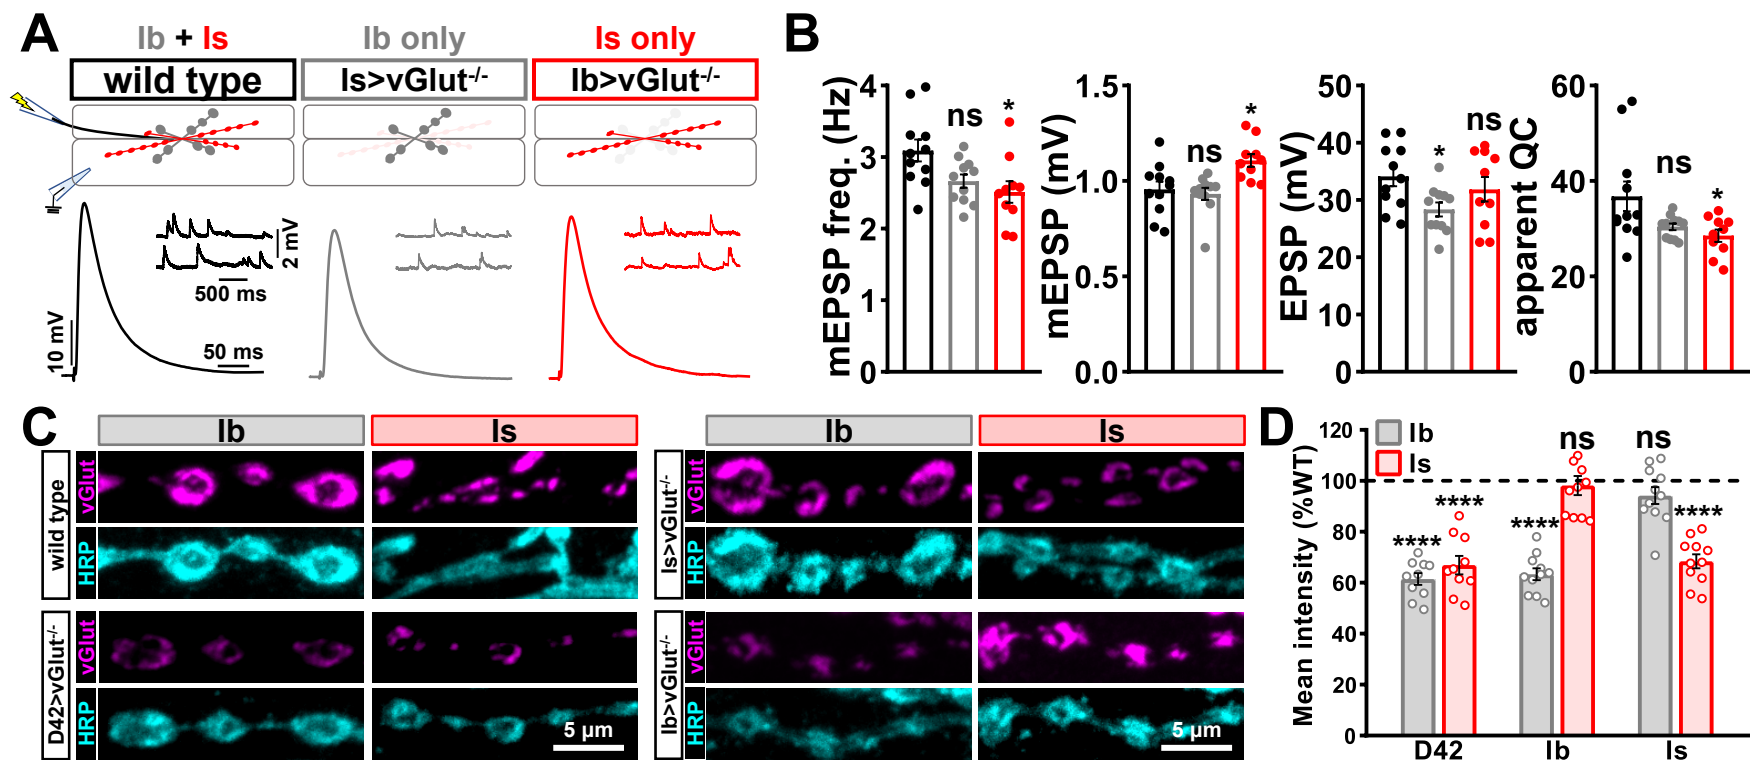

Supplement: supp [file elife-77924-supp-v1.zip › elife_poa_e77924_Figure_1_figure_supplement_3.pdf]

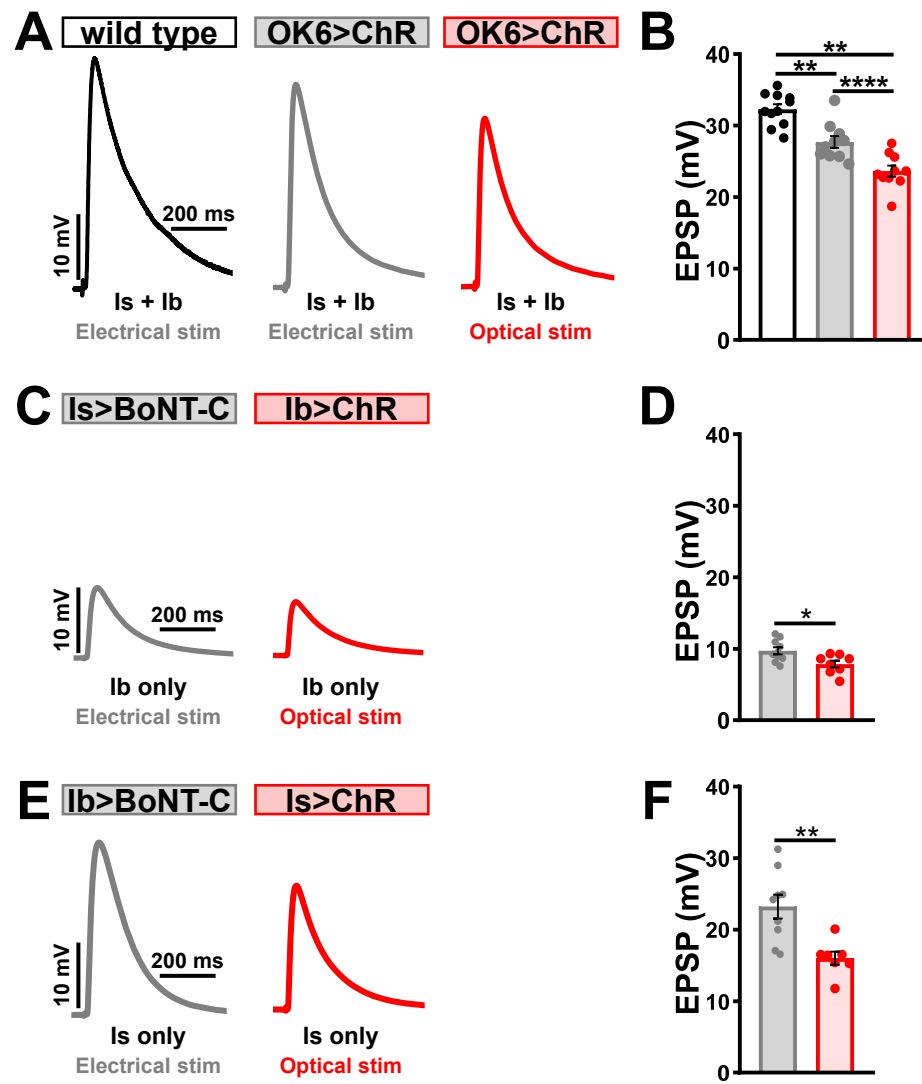

Supplement: supp [file elife-77924-supp-v1.zip › elife_poa_e77924_Figure_1_figure_supplement_4.pdf]

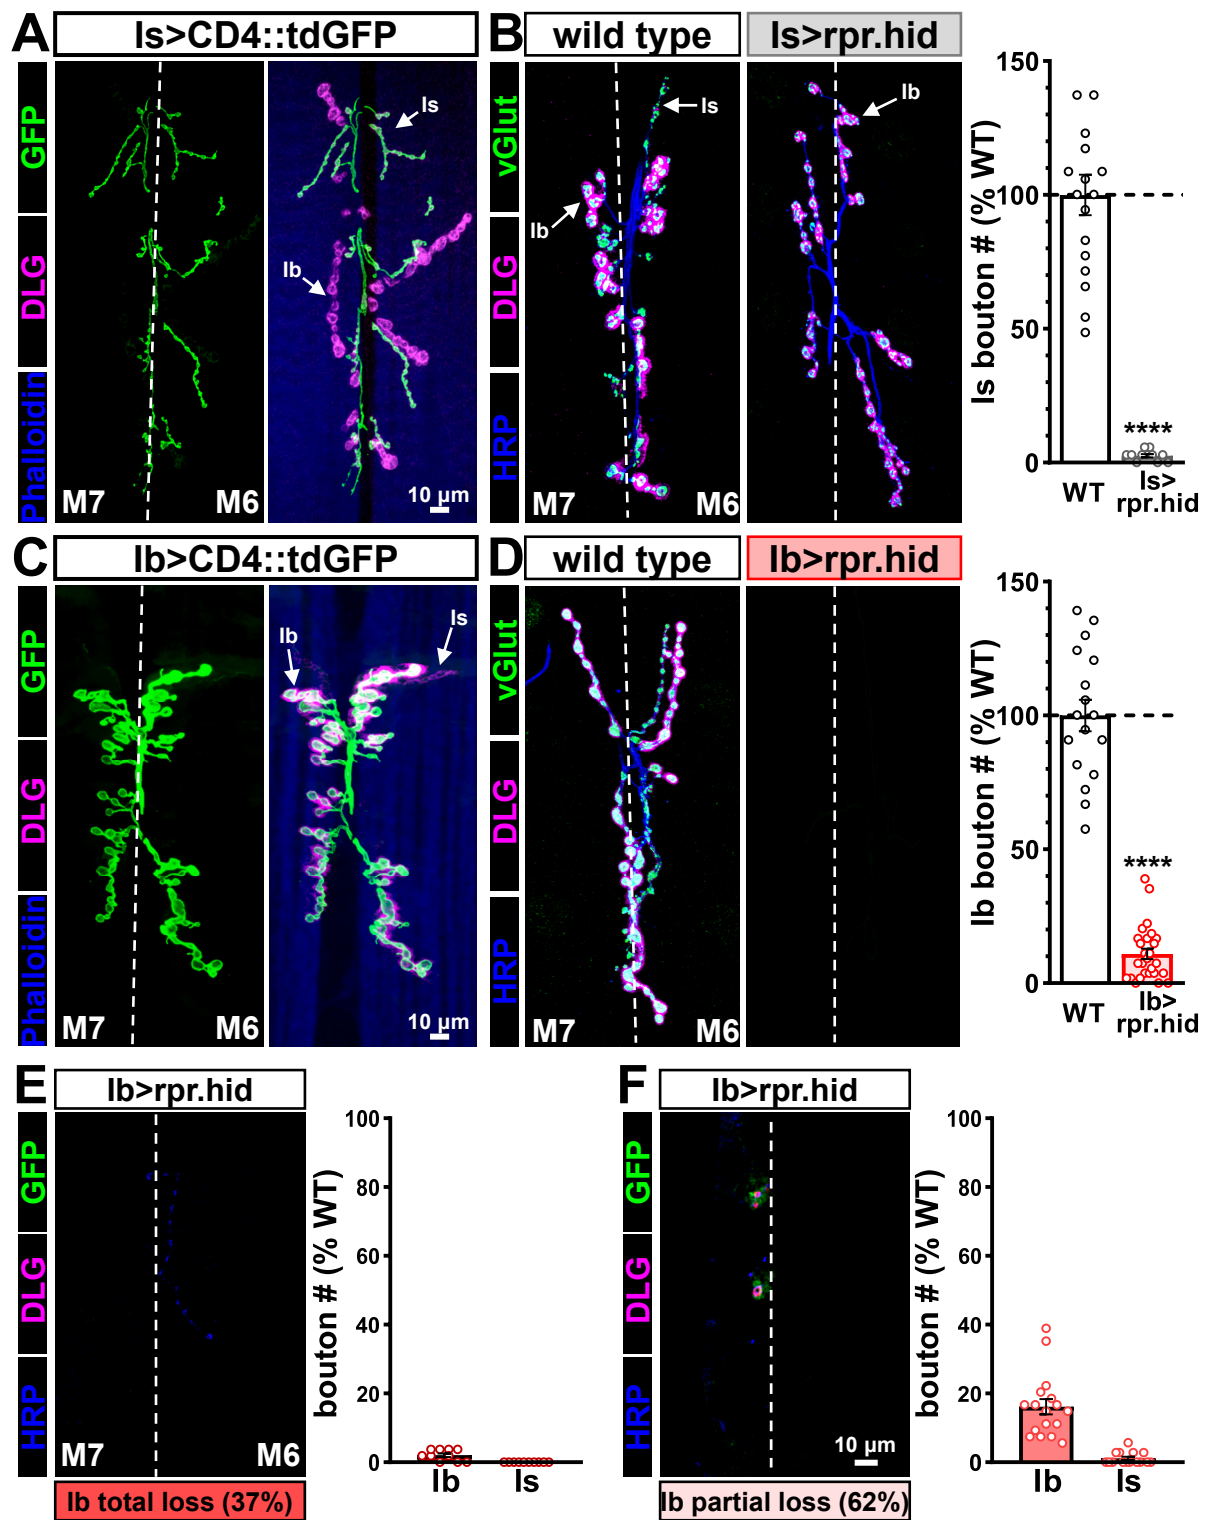

Supplement: supp [file elife-77924-supp-v1.zip › elife_poa_e77924_Figure_1_figure_supplement_5.pdf]

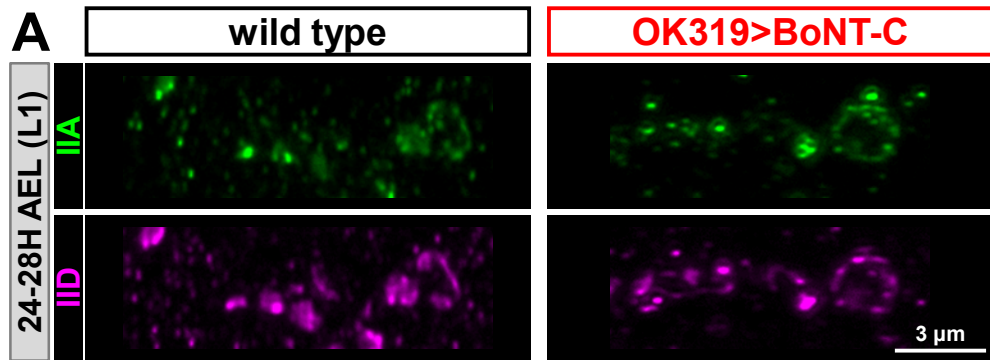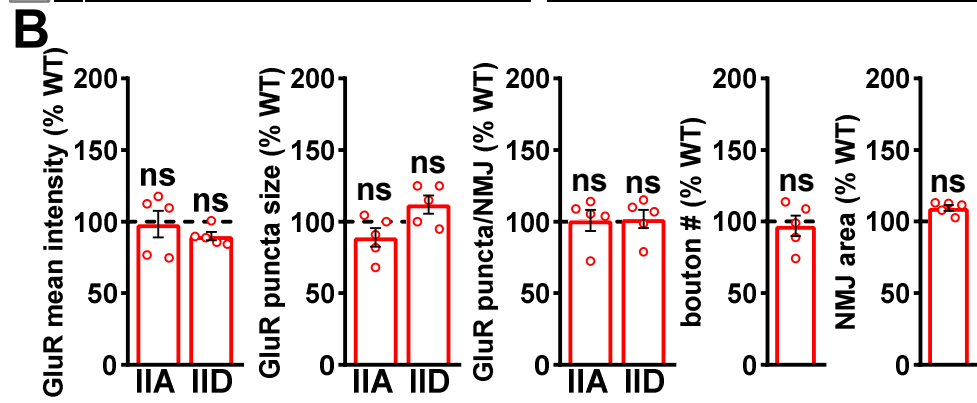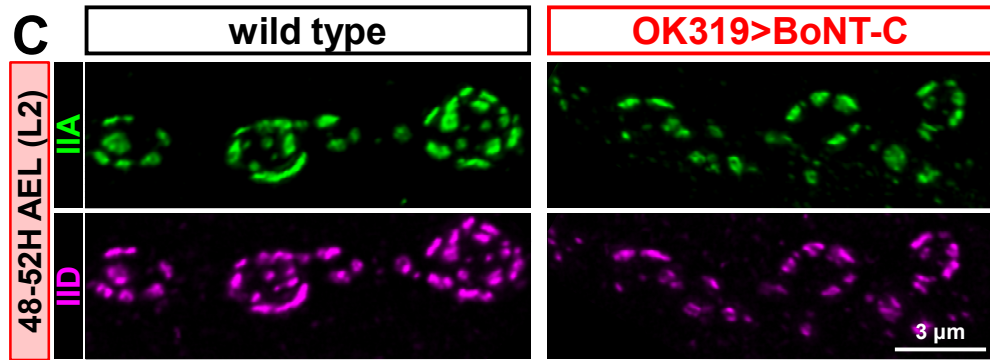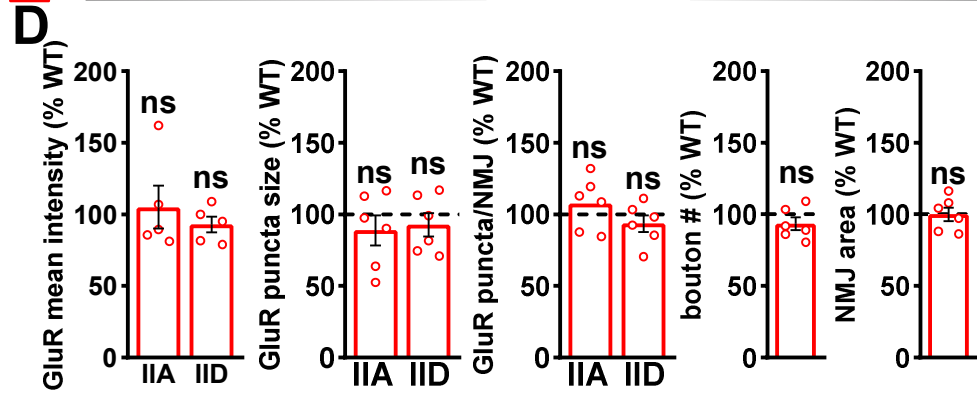

Supplement: supp [file elife-77924-supp-v1.zip › elife_poa_e77924_Figure_4_figure_supplement_1.pdf]

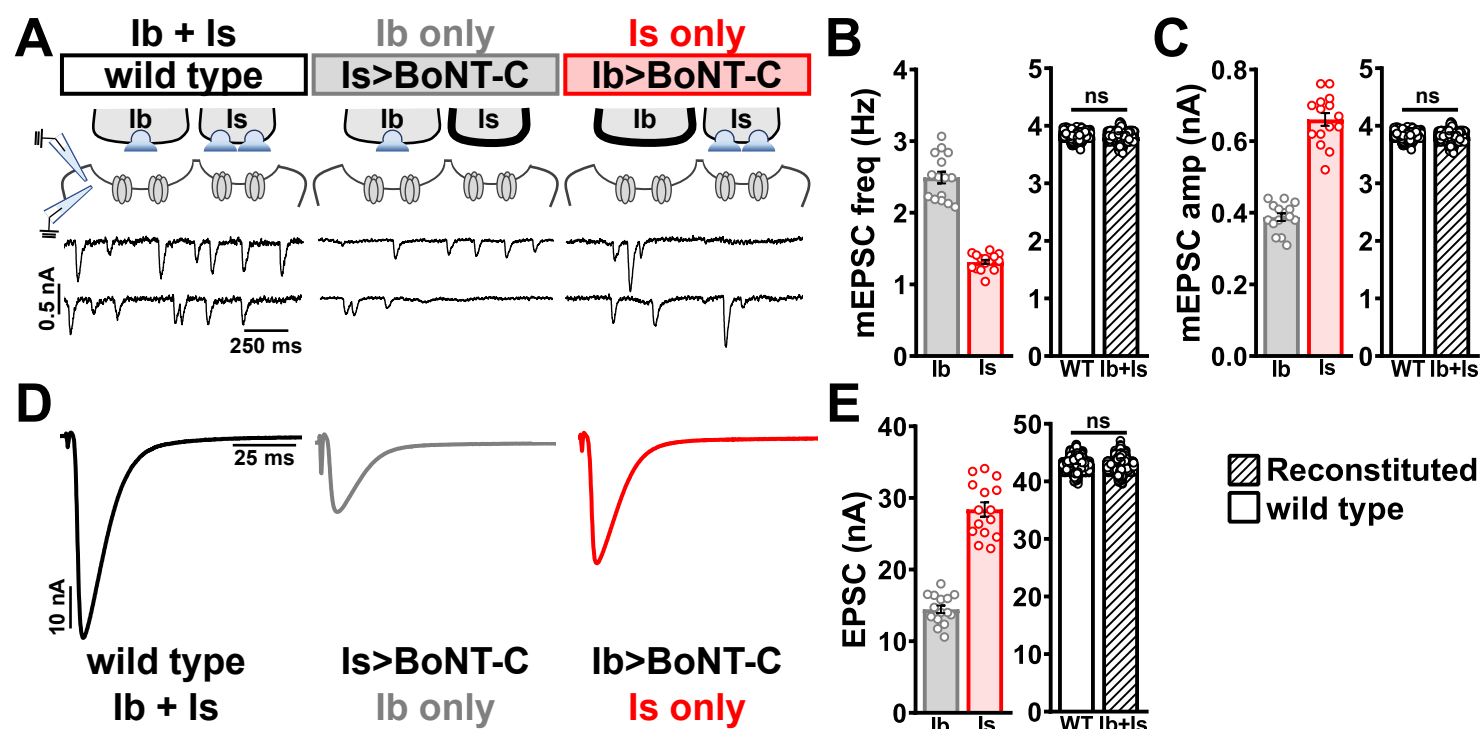

Supplement: supp [file elife-77924-supp-v1.zip › elife_poa_e77924_Figure_7_figure_supplement_1.pdf]
